# Supplementary material for: Hypothalamic mTORC2 is essential for metabolic health and longevity
Source: PubMed Central journal article supplement (PMC6718533; doi:10.1111/acel.13014), 2019-08-01

# Supplementary Figure 1. Deletion of *Rictor* in *Nkx2.1* expressing neurons

**A**

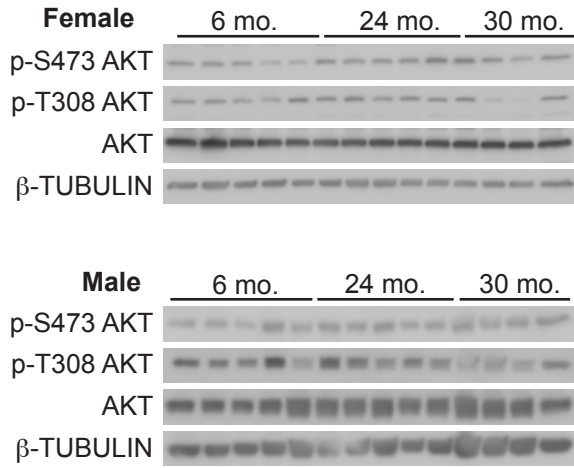

**B**

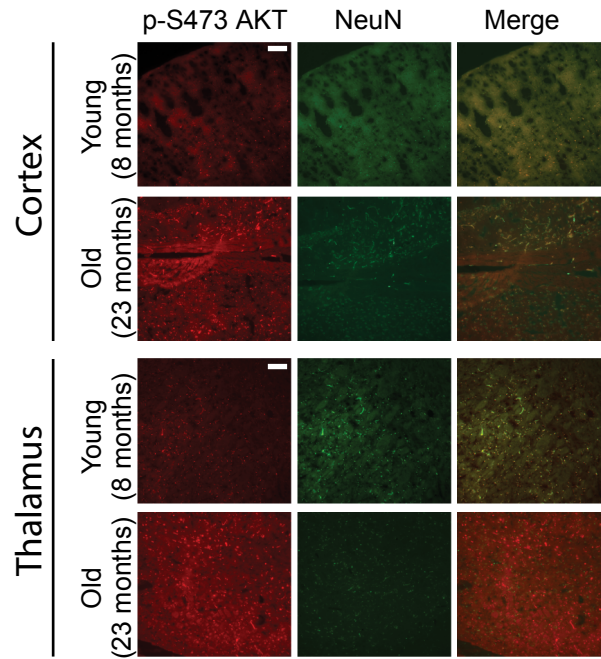

**C**

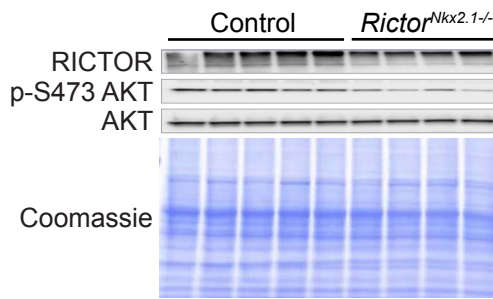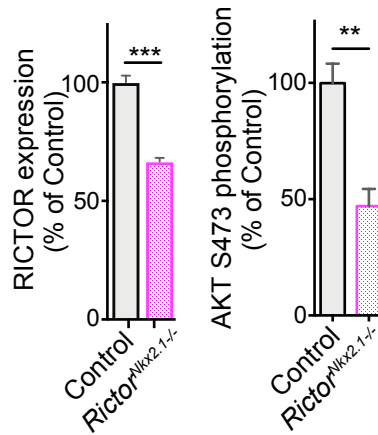

**D**

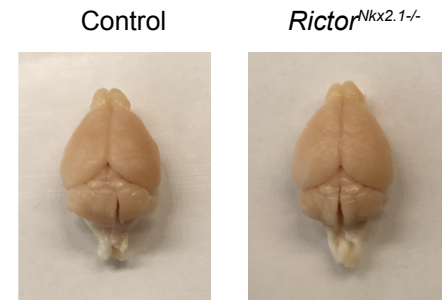

**E**

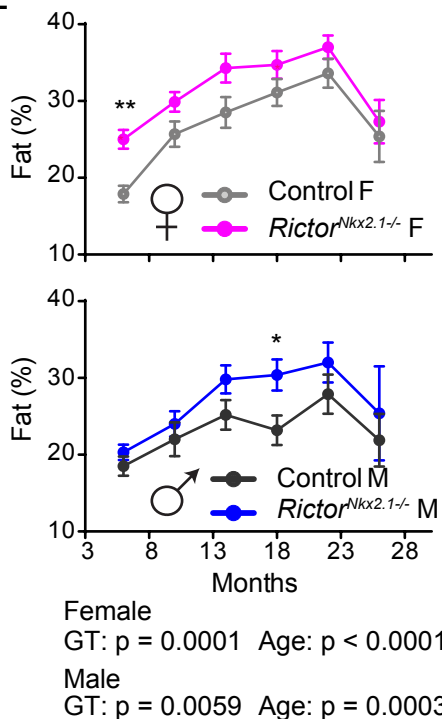

**F**

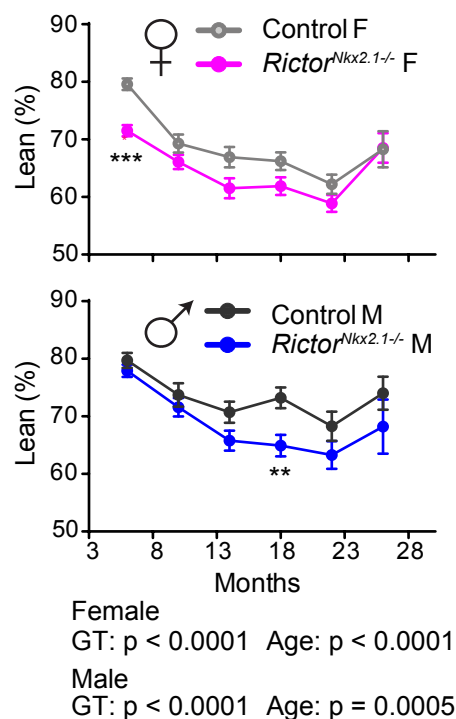

Supplement: ACEL-18-e13014-s001.pdf [file ACEL-18-e13014-s001.pdf]
